# Supplementary material for: Preparation of samples for leaf architecture studies, a method for mounting cleared leaves
Source: PubMed Central journal article supplement — Appl Plant Sci. 2014 Sep 11;2(9):apps.1400038. doi: 10.3732/apps.1400038 (PMC4162665; doi:10.3732/apps.1400038), 2014-09-11

Appendix S1. Principal steps of the leaf clearing process. (A) Leaf in glass container, covered with nylon screening and weights. (B) Leaf immersed in 5% NaOH. (C) Leaves in oven at 40–54°C. (D) Leaf partially cleared. (E) Cleared leaf. (F) Leaf immersed in sodium hypochlorite.

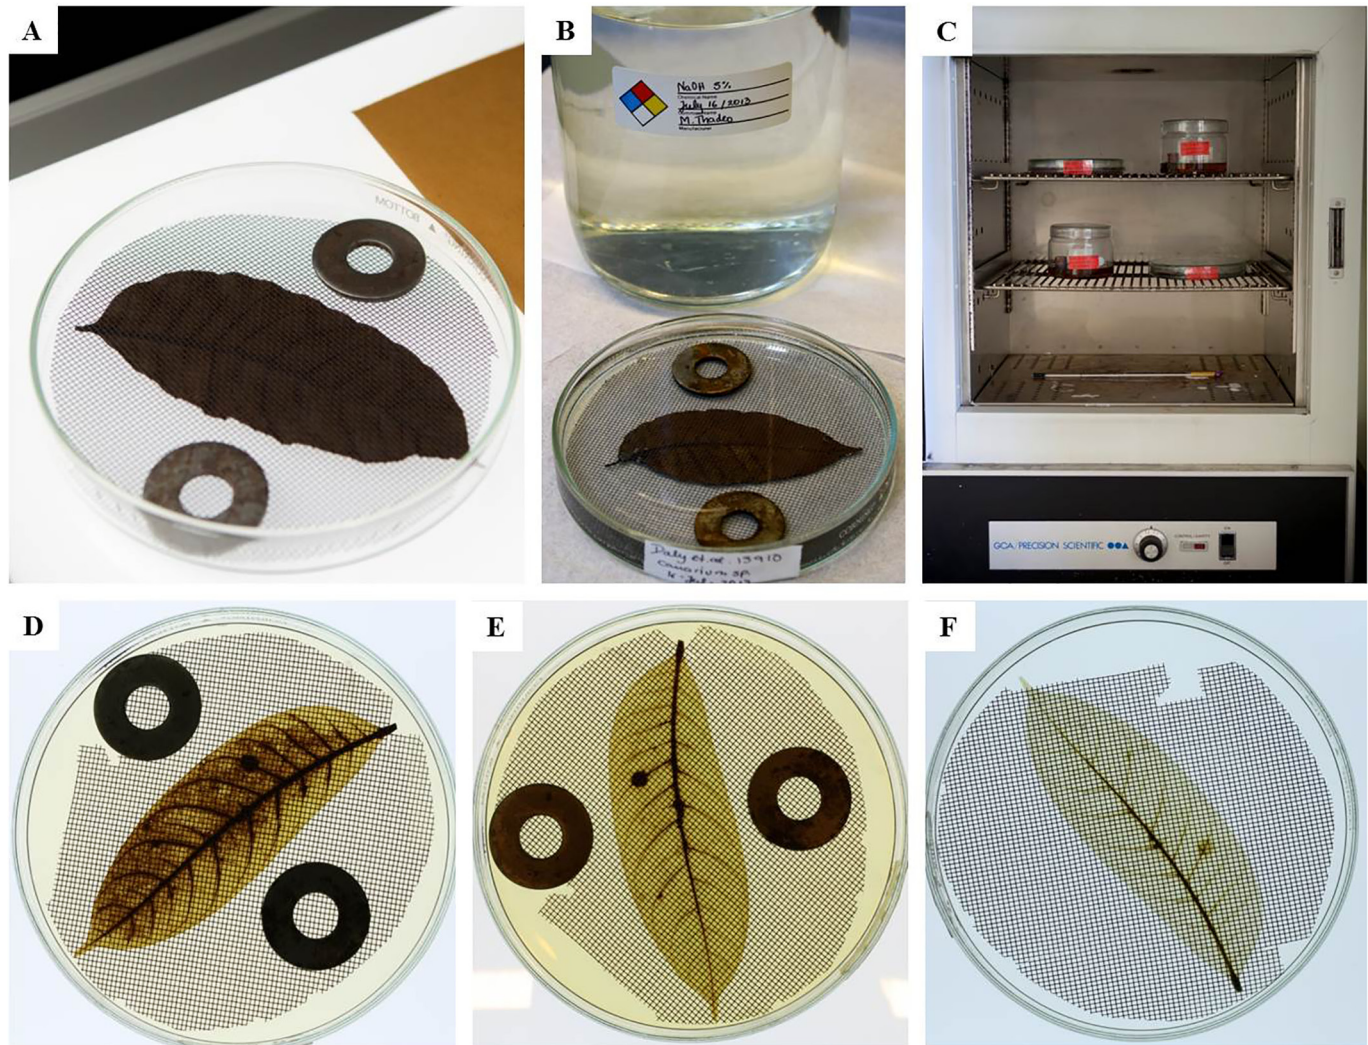

Supplement: apps.1400038_s1.pdf [file apps.1400038_s1.pdf]
